# Supplementary material for: Effects of charge asymmetry on the liquid–liquid phase separation of polyampholytes and their condensate properties
Source: Royal Society of Chemistry journal article supplement (doi:10.1039/d4sm00532e), 2024-01-01
Supplement: d4sm00532e1.pdf [file d4sm00532e1.pdf]

## Supporting Information for

### Effects of charge asymmetry on the liquid-liquid phase separation of polyampholytes and their condensate properties

Yaxin An,<sup>\*a</sup> Tong Gao,<sup>a</sup> Tianyi Wang,<sup>a</sup> Donghui Zhang,<sup>b</sup> Bhuvnesh Bharti<sup>a</sup>

Corresponding author: Yaxin An, [yxan@lsu.edu](mailto:yxan@lsu.edu)

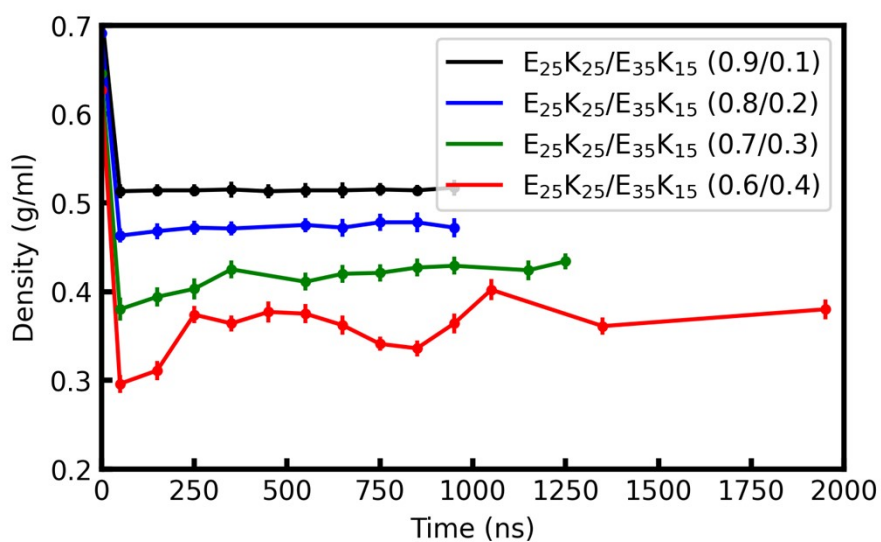

Fig. S1. The density of the condensate phases in the systems of  $E_{25}K_{25}/E_{35}K_{15}$  (0.9/0.1, 0.8/0.2, 0.7/0.3, and 0.6/0.4). The density is averaged every 100 ns of the simulation trajectory.

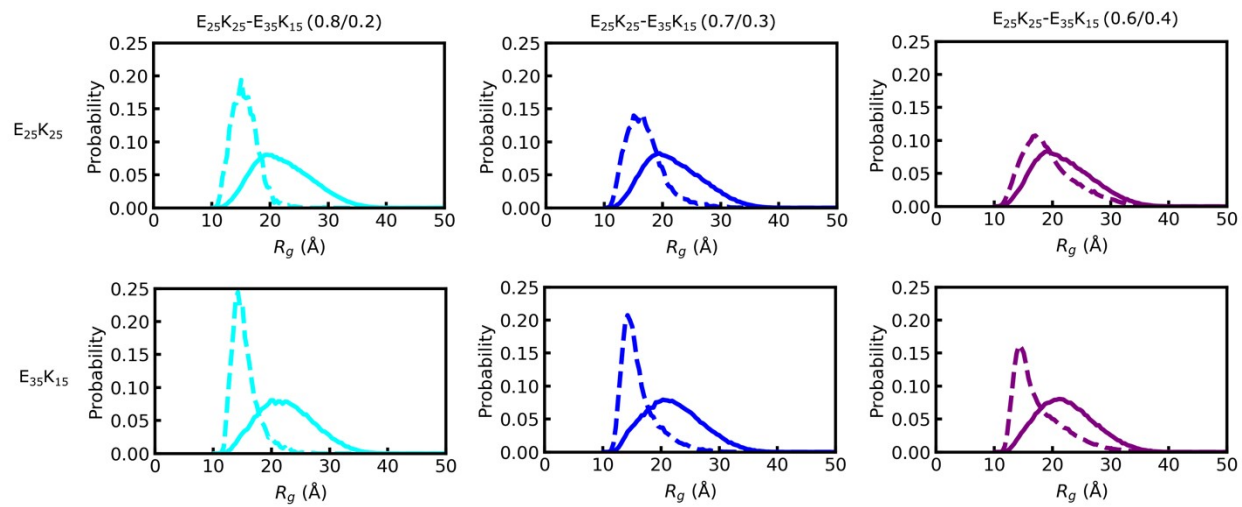

Fig. S2. The  $R_g$  distributions of  $E_{25}K_{25}$  and  $E_{35}K_{15}$  in the dilute (dashed lines) and condensate (solid) phases. The condensate phases are indicated in Fig. 2 of the main manuscript.
